# Supplementary material
Source: HighWire-hosted journal article supplement (https://bmjopenquality.bmj.com/highwire/filestream/136002/field_highwire_adjunct_files/0/ds3120.docx)
Supplement: ds3120.docx [file ds3120.docx]

| Enterprise | No. Work Tasters | No. Work Experience | No. Employed |
| --- | --- | --- | --- |
| Café | 56 | 27 | 10 |
| Piazza | 16 | 14 | 11 |
| D&P | 14 | 12 | 1 |
| Landscaping | 16 | 15 | 1 |
| Picture framing | 7 | 7 | 0 |
| WH shop | 11 | 3 | 5 |
| WH sandwich run | 13 | 5 | 5 |
| Salon | 4 | 3 | 0 |
| Total | **137** | **86** | **33** |

Table 1: Number of service users engaged in the service January 2013 – January 2014
